# Supplementary material for: Gastric Corpus Mucosal Hyperplasia and Neuroendocrine Cell Hyperplasia, but not Spasmolytic Polypeptide-Expressing Metaplasia, Is Prevented by a Gastrin Receptor Antagonist in H+/K+ATPase Beta Subunit Knockout Mice
Source: PubMed Central journal article supplement (PMC7037105; doi:10.3390/ijms21030927), 2020-01-31
Supplement: ijms-21-00927-s001.pdf [file ijms-21-00927-s001.pdf]

**Supplementary Table S1.** Global gene expression analysis in WT/PEG vs WT/NTZ mice. Only three genes were differentially expressed with adjusted p-value (q-value) < 0.05 in the gastric corpus mucosa. A negative Log2 fold change signifies a significantly lower expression in the WT/NTZ vs WT/PEG group. Green: significant change (qval > 0.05).

| <i>Target Id</i>   | <i>Gene symbol</i> | <b>Log2 fold change</b> | <b>p-value</b> |
|--------------------|--------------------|-------------------------|----------------|
| ENSMUST00000109775 | Apo19b             | -2.09                   | 0.0143         |
| ENSMUST00000129733 | Tpm1               | -3.10                   | 0.0143         |
| ENSMUST00000033738 | Trex2              | -1.43                   | 0.0143         |
